# Supplementary material for: Structural and functional distinctions of co-resident microglia and monocyte-derived macrophages after retinal degeneration
Source: Springer Nature journal article supplement (doi:10.1186/s12974-022-02652-2), 2022-12-12

Day 8

YFP

tdTomato

Overlay

Pseudocolored

Inner Retina

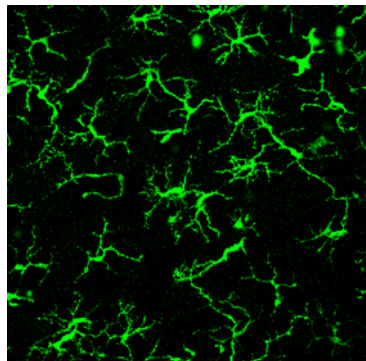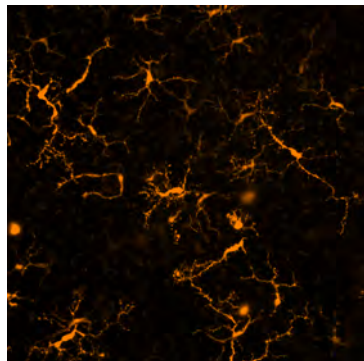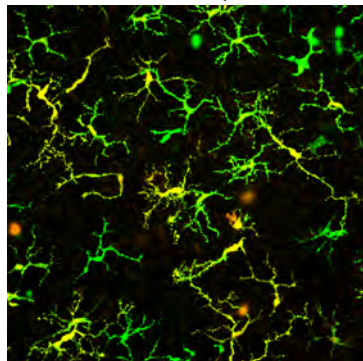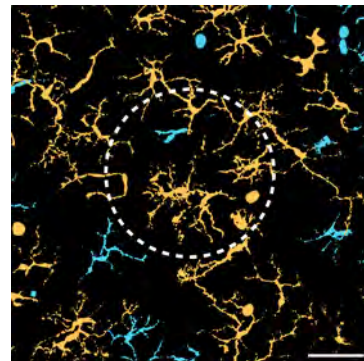

Subretinal

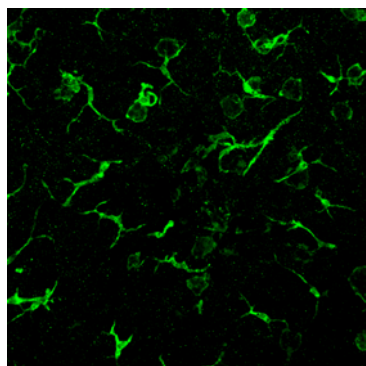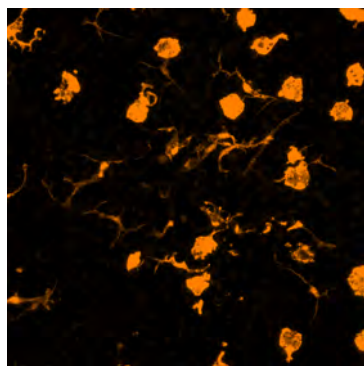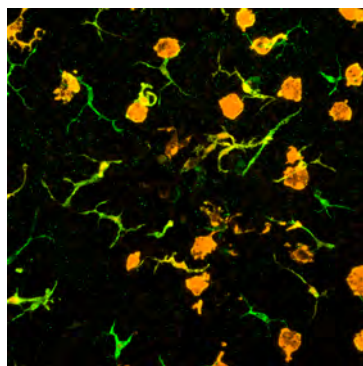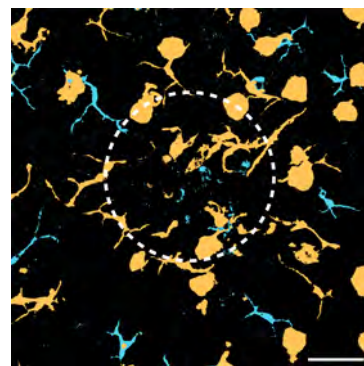

Inner Retina

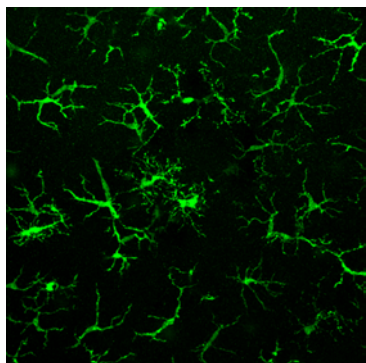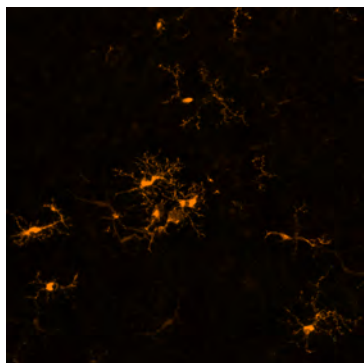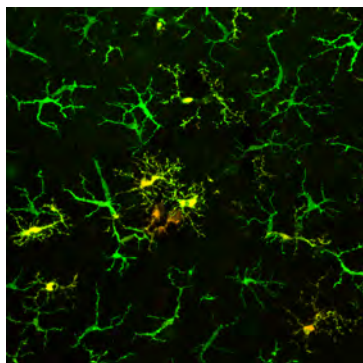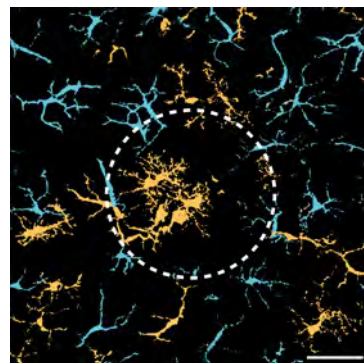

Subretinal

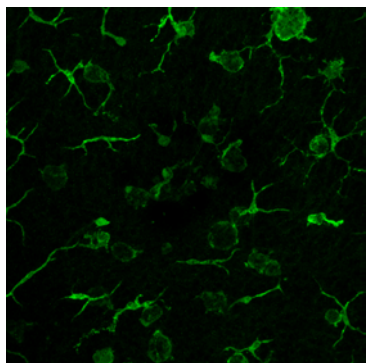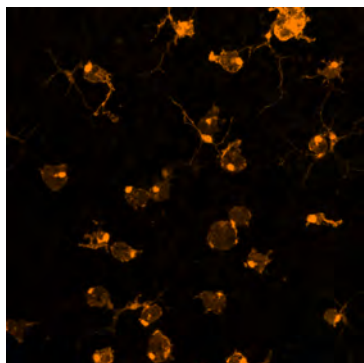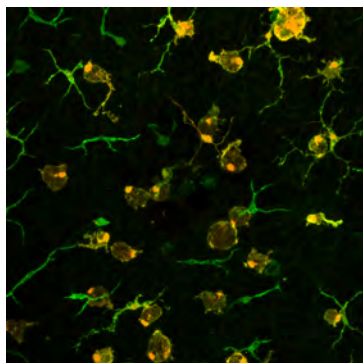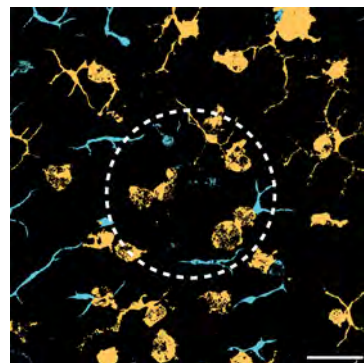

Supplement: MOESM7 [file 23816284]
